# Supplementary material
Source: publisher site journal article supplement (https://www.spandidos-publications.com/7234/downloadSupplementary)

Figure S1. Genotyping was performed through gel electrophoresis. Lane 1 represents heterozygote; lane 2 represents wild-type; lane 3 represents homozygous. KO, IncPrep + 96kb knockout mice primers; WT, IncPrep + 96kb wild-type primers, M, Trans2K<sup>®</sup> Plus DNA Marker; N, Negative Control (1X RNA Loading Buffer).

Trans2K<sup>®</sup> Plus DNA Marker

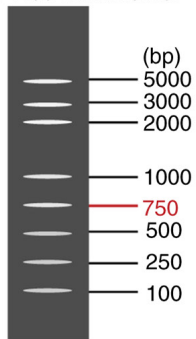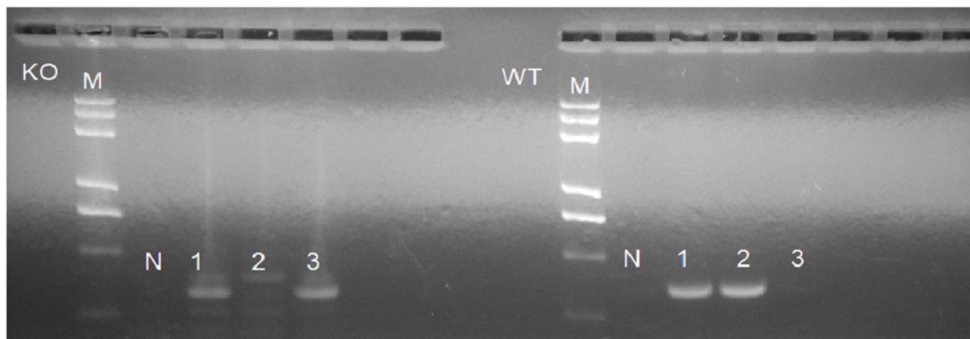

Figure S2. Weight of WT and KO mice was measured on days 21, 25, 29, 33 and 37. WT, wild-type; KO, knockout; ns, not significant.

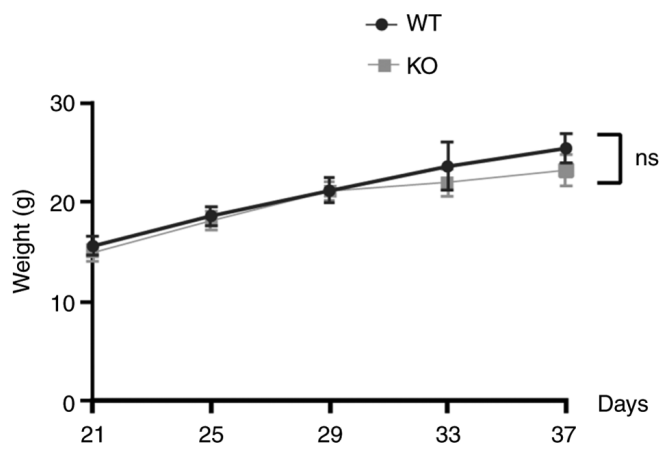

Figure S3. Effects of plasmid transfection were verified using quantitative PCR and western blotting. (A) mRNA levels of IncPrep + 96kb and (B) POP, and (C) protein levels of POP following overexpression of IncPrep + 96kb (PCDNA3.0-IncPrep + 96kb 2.2kb and PCDNA3.0-IncPrep + 96kb 2.8kb) and POP (pMigR1-POP). \*P<0.05, \*\*P<0.01. POP, prolyl oligopeptidase.

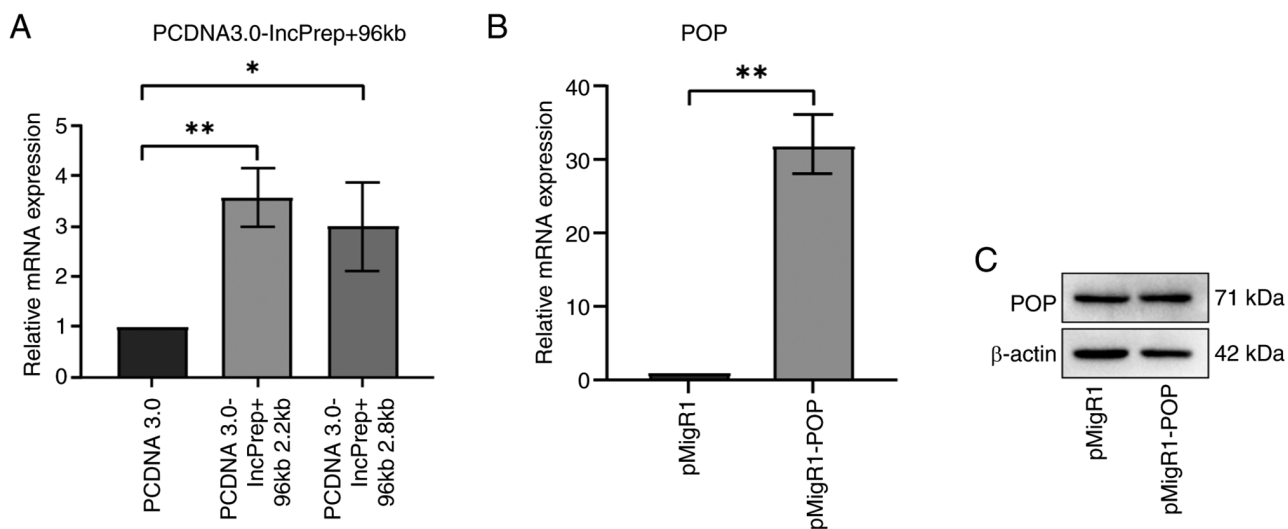

Supplement: Supplementary file 1 [file downloadSupplementary]
